# Supplementary material
Source: publisher site journal article supplement (https://www.dovepress.com/article/569175)
Supplement: Supplementary file 1 [file 569175_Supplementary%20Material.docx]

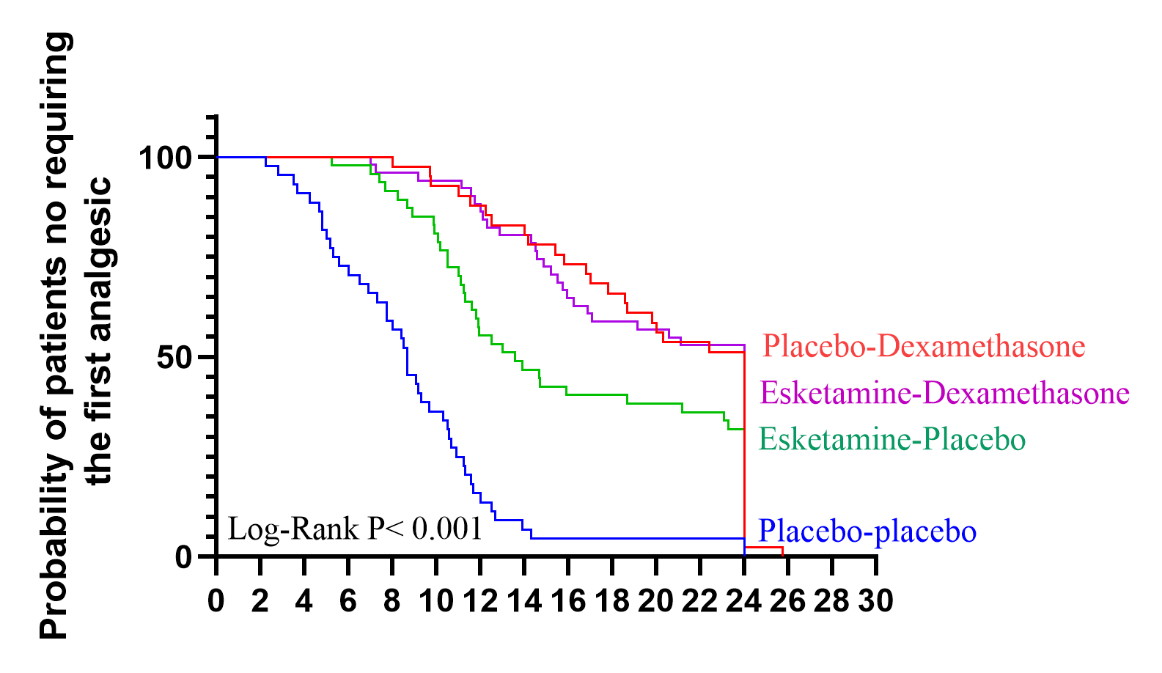


**Supplementary Figure 1:** Kaplan-Meier survival plot representing the first request for analgesic among groups.

**Supplementary Table 1**: Multivariable logistic regression model for risk factors associated with rebound pain

| Risk factor | Odds ratio | 5% Conf.  lower | 95% Conf. upper | P value |
| --- | --- | --- | --- | --- |
| Group |  |  |  |  |
| Placebo–placebo | Ref | Ref | Ref |  |
| Placebo-dexamethasone | 0.27 | 0.18 | 0.75 | 0.030 |
| Esketamine-  placebo | 0.46 | 0.13 | 1.51 | 0.313 |
| Esketamine-  dexamethasone | 0.19 | 0.05 | 0.60 | 0.006 |
| Female sex | 0.88 | 0.36 | 2.14 | 0.769 |
| Inserted anchors. No. | 1.33 | 1.06 | 1.69 | 0.016 |
| Preoperative  maximal pain | 1.24 | 1.03 | 1.55 | 0.045 |
| Preoperative  night pain | 0.96 | 0.77 | 1.19 | 0.717 |
| Positive  preoperative CSI  score (>40/100) | 2.39 | 0.54 | 10.00 | 0.233 |
| Positive  preoperative PCS  score (>14/52) | 4.63 | 0.92 | 26.59 | 0.069 |
| High preoperative  PCS score (>26/52) | 1.27 | 1.02 | 1.68 | 0.039 |
| PSOI score | 1.09 | 0.96 | 1.23 | 0.192 |
| DN4 score | 1.10 | 0.66 | 1.80 | 0.715 |
